# Supplementary material
Source: ML conference proceedings conference paper supplement (https://openreview.net/forum?id=0usGhloD12)
Supplement: supplementary_material [file attachment]

---

## Supplementary Material

---

Karim Tit<sup>1,2</sup>

Teddy Furon<sup>2</sup>

<sup>1</sup>University of Luxembourg, Luxembourg, LU<sup>†</sup>

<sup>2</sup>Inria, CNRS, IRISA, University of Rennes, Rennes, FR

### A ADDITIONAL SIMULATION RESULTS FOR FORM AND SORM

We report below additional results for the FORM and SORM methods.

Table 4: FORM/SORM estimations of  $P_F \approx 1.69 \cdot 10^{-8}$  for the model  $M_2$  and input  $\mathbf{x}_{0,2}$ , with uniform noise ( $\varepsilon = 0.18$ ).

| Attack | $P_F^{\text{FORM}}$  | $P_F^{\text{SORM}}$  | $\cos(\tilde{u}^*, \nabla G(\tilde{u}^*))$ |
|--------|----------------------|----------------------|--------------------------------------------|
| CW     | $1.74 \cdot 10^{-5}$ | $6.88 \cdot 10^{-9}$ | -0.95                                      |
| FMNA   | $3.17 \cdot 10^{-5}$ | $6.12 \cdot 10^{-9}$ | -0.996                                     |
| HLRF   | $1.89 \cdot 10^{-5}$ | $7.56 \cdot 10^{-9}$ | -0.97                                      |
|        | $\ \tilde{u}^*\ _2$  | $G(\tilde{u}^*)$     | Time (in sec.)                             |
| CW     | 4.14                 | $-2.1 \cdot 10^{-5}$ | 1.05                                       |
| FMNA   | 4.0                  | $-1.9 \cdot 10^{-5}$ | 0.25                                       |
| HLRF   | 4.12                 | $-2.3 \cdot 10^{-2}$ | 0.01                                       |

Table 5: FORM/SORM estimations of  $P_F \approx 8.1 \cdot 10^{-3}$  for the model  $M_2$  and input  $\mathbf{x}_{0,3}$ , with uniform noise ( $\varepsilon = 0.18$ )

| Attack | $P_F^{\text{FORM}}$  | $P_F^{\text{SORM}}$  | $\cos(\tilde{u}^*, \nabla G(\tilde{u}^*))$ |
|--------|----------------------|----------------------|--------------------------------------------|
| CW     | $3.22 \cdot 10^{-2}$ | $5.23 \cdot 10^{-3}$ | -0.95                                      |
| FMNA   | $3.84 \cdot 10^{-2}$ | $5.37 \cdot 10^{-3}$ | -0.988                                     |
| HLRF   | $3.29 \cdot 10^{-2}$ | $5.35 \cdot 10^{-3}$ | -0.957                                     |
|        | $\ \tilde{u}^*\ _2$  | $G(\tilde{u}^*)$     | Time (in sec.)                             |
| CW     | 1.85                 | $-1.0 \cdot 10^{-5}$ | 0.9                                        |
| FMNA   | 1.77                 | $-1.1 \cdot 10^{-5}$ | 0.01                                       |
| HLRF   | 1.84                 | $-1.8 \cdot 10^{-2}$ | 0.16                                       |

Table 6: FORM/SORM estimations of  $P_F \approx 9.92 \cdot 10^{-6}$  for the model  $M_2$  and input  $\mathbf{x}_{0,1}$ , with uniform noise ( $\varepsilon = 0.18$ ).

| Attack | $P_F^{\text{FORM}}$  | $P_F^{\text{SORM}}$  | $\cos(\tilde{u}^*, \nabla G(\tilde{u}^*))$ |
|--------|----------------------|----------------------|--------------------------------------------|
| CW     | $6.64 \cdot 10^{-4}$ | $4.66 \cdot 10^{-6}$ | -0.96                                      |
| FMNA   | $8.45 \cdot 10^{-4}$ | $3.83 \cdot 10^{-6}$ | -0.993                                     |
| HLRF   | $7.36 \cdot 10^{-4}$ | $6.53 \cdot 10^{-6}$ | -0.96                                      |
|        | $\ \tilde{u}^*\ _2$  | $G(\tilde{u}^*)$     | Time (in sec.)                             |
| CW     | 3.21                 | $-1.9 \cdot 10^{-5}$ | 1.07                                       |
| FMNA   | 3.14                 | $-2.5 \cdot 10^{-5}$ | 0.30                                       |
| HLRF   | 3.18                 | $-2.1 \cdot 10^{-2}$ | 0.05                                       |

Table 7: FORM/SORM estimations of  $P_F \approx 5.7 \cdot 10^{-6}$  for the custom CNN model, with gaussian noise ( $\sigma = 0.02$ ).

| Attack | $P_F^{\text{FORM}}$  | $P_F^{\text{SORM}}$  | $\cos(\tilde{u}^*, \nabla G(\tilde{u}^*))$ |
|--------|----------------------|----------------------|--------------------------------------------|
| CW     | $3.91 \cdot 10^{-5}$ | NA                   | -0.96                                      |
| FMNA   | $5.22 \cdot 10^{-5}$ | NA                   | -0.985                                     |
| HLRF   | $2.16 \cdot 10^{-5}$ | NA                   | -0.973                                     |
|        | $\ \tilde{u}^*\ _2$  | $G(\tilde{u}^*)$     | Time (in sec.)                             |
| CW     | 3.95                 | $-3.7 \cdot 10^{-5}$ | 1.49                                       |
| FMNA   | 3.88                 | $-8.0 \cdot 10^{-4}$ | 0.23                                       |
| HLRF   | 4.09                 | $-1.9 \cdot 10^{-2}$ | 0.03                                       |
